# Supplementary material
Source: PubMed Central journal article supplement (PMC4435589)

Figure S1

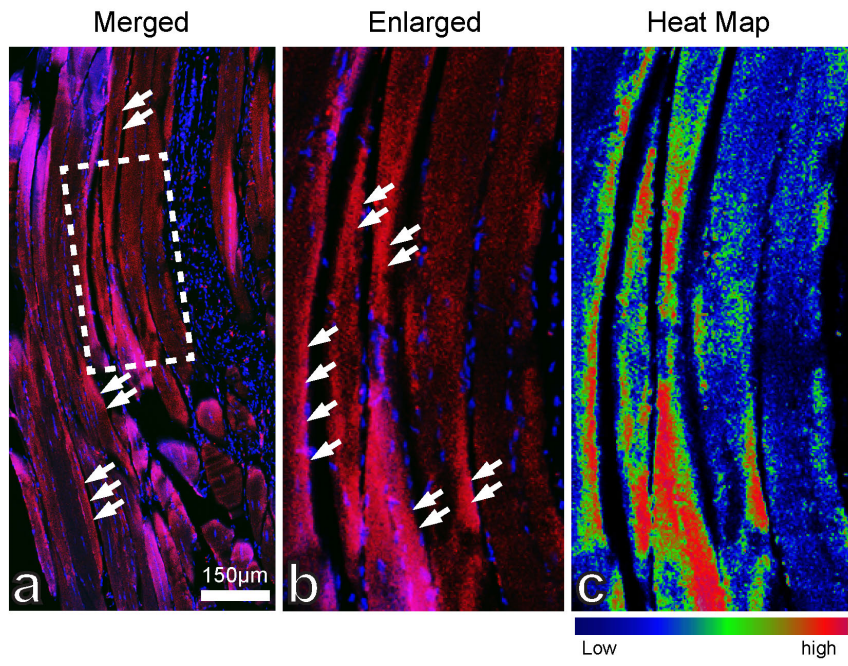

Supplement: mt201478x1.pdf [file mt201478x1.pdf]
